# Supplementary material
Source: Springer Nature journal article supplement (https://www.springermedizin.de/resource/supplementary/12913_2013_3733_MOESM7_ESM.pdf/9532472)

Focus of the study

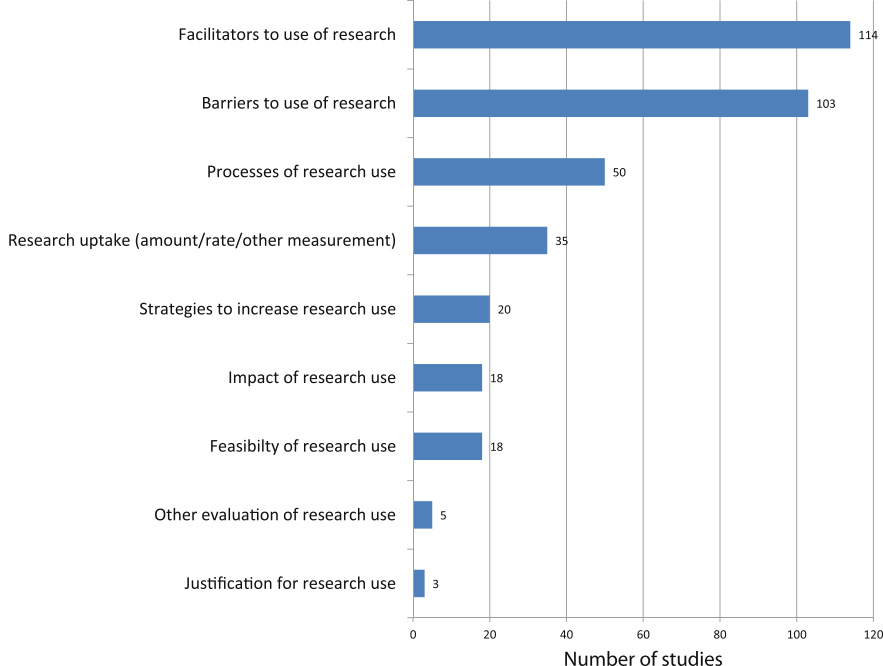

Supplement: MOESM7 [file 9532472]
